# Supplementary material
Source: PubMed Central journal article supplement (PMC10265290)
Supplement: jama-e237843-s002.pdf [file jama-e237843-s002.pdf]

## Supplemental Online Content

Schrag D, Uno H, Rosovsky R, et al; CANVAS Investigators. Direct oral anticoagulants vs low-molecular-weight heparin and recurrent VTE in patients with cancer: a randomized clinical trial. *JAMA*. Published online June 2, 2023. doi:10.1001/jama.2023.7843

**eTable 1.** Adjusted Event Rates of Recurrent VTE, Death, and Major Bleeding at 6 Months in the Randomized Cohort by Generalized Linear Mixed-Effects Models

**eFigure 1.** Forest Plot of the Likelihood of Recurrent VTE in Pre-defined Participant Subgroups in the Randomized Cohort

**eFigure 2.** Patient Dispositions in the Preference Cohort

**eTable 2.** Baseline Participant Characteristics in a Study of the Effect of Direct Oral Anticoagulants Versus Low Molecular Weight Heparins for Treatment of Venous Thromboembolic Events in Patients With Cancer (the Preference Cohort)

**eTable 3.** Clinical Outcomes at 6 Months in the Preference Cohort

**eTable 4.** Patient-Reported Outcomes in the Preference Cohort: Health-Related Quality of Life, Treatment Burden and Persistence With Anticoagulant Therapy

**eTable 5.** Propensity Score Model Used for Adjustment of Potential Confounding Factors in the Preference Cohort

**eTable 6.** Association Between the Treatment Selection and the Baseline Characteristics With and Without Adjustment by the Inverse Probability Weighting by the Propensity Scores in the Preference Cohort

This supplemental material has been provided by the authors to give readers additional information about their work.

**eTable 1. Adjusted Event Rates of Recurrent VTE, Death, and Major Bleeding at 6 Months in the Randomized Cohort by Generalized Linear Mixed-Effects Models**

| Endpoint                    | DOAC | LMWH | Difference<br>Estimate | (0.95 confidence interval) |             |
|-----------------------------|------|------|------------------------|----------------------------|-------------|
|                             |      |      |                        | one-sided                  | two-sided   |
| Recurrent VTE (primary) [%] | 6.0  | 8.7  | -2.7                   | (-100, 0.8)                | (-6.9, 1.5) |
| Death (event rate) [%]      | 20.8 | 18.0 | 2.8                    | NA                         | (-3.5, 9.2) |
| Major bleeding [%]          | 4.9  | 5.3  | -0.4                   | (-100, 2.5)                | (-3.8, 3.1) |

**eFigure 1. Forest Plot of the Likelihood of Recurrent VTE in Pre-defined Participant Subgroups in the Randomized Cohort**

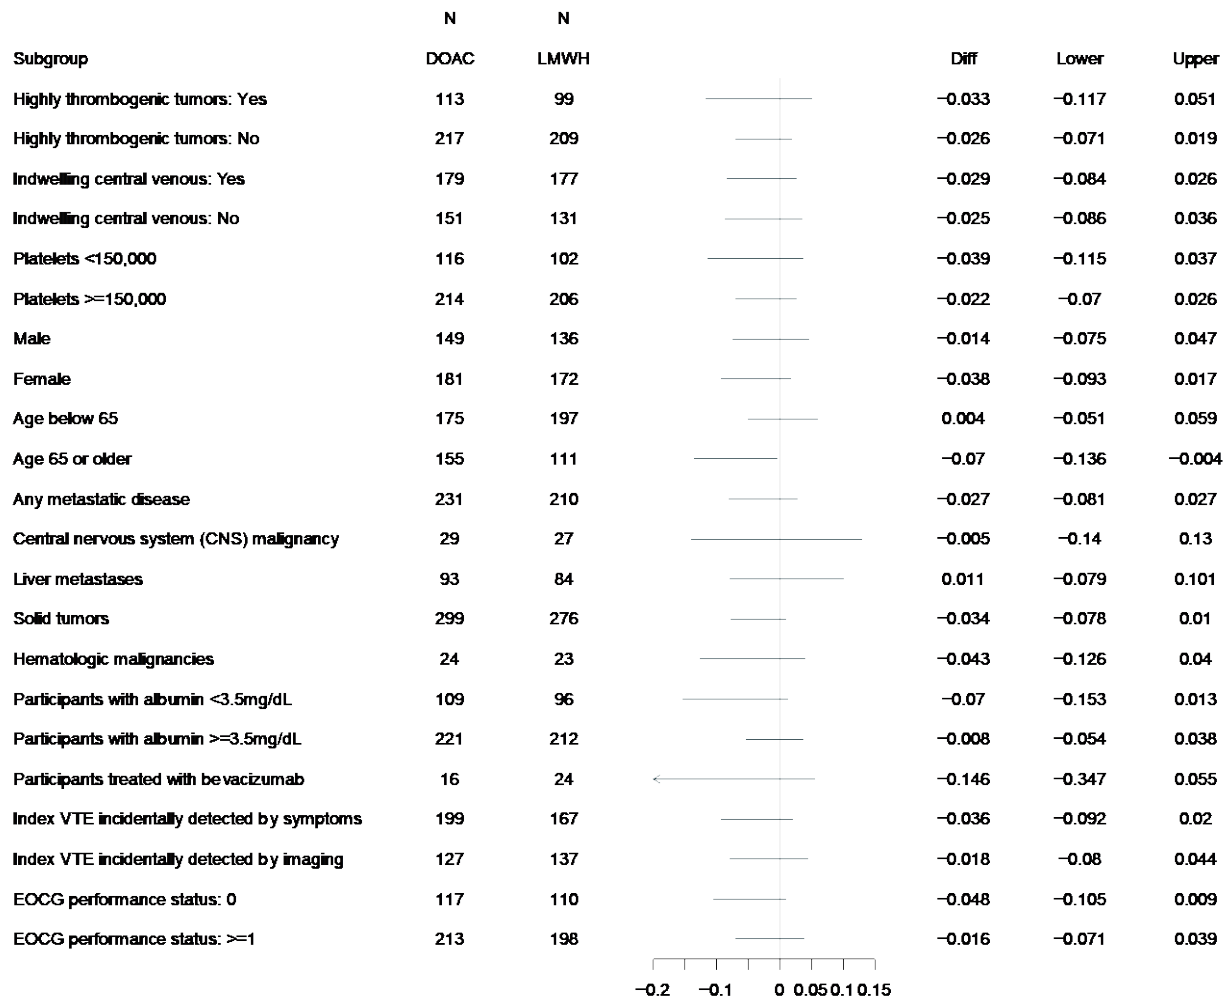

Abbreviations: DOAC, direct oral anticoagulants; LMWH, low molecular weight heparin; VTE, venous thromboembolism; ECOG; eastern cooperative oncology group. The horizontal lines show two-sided 0.95 confidence interval for the difference (DOAC versus LMMW) in cumulative incidence rate of recurrent VTE event at 6 months.

**eFigure 2. Patient Dispositions in the Preference Cohort**

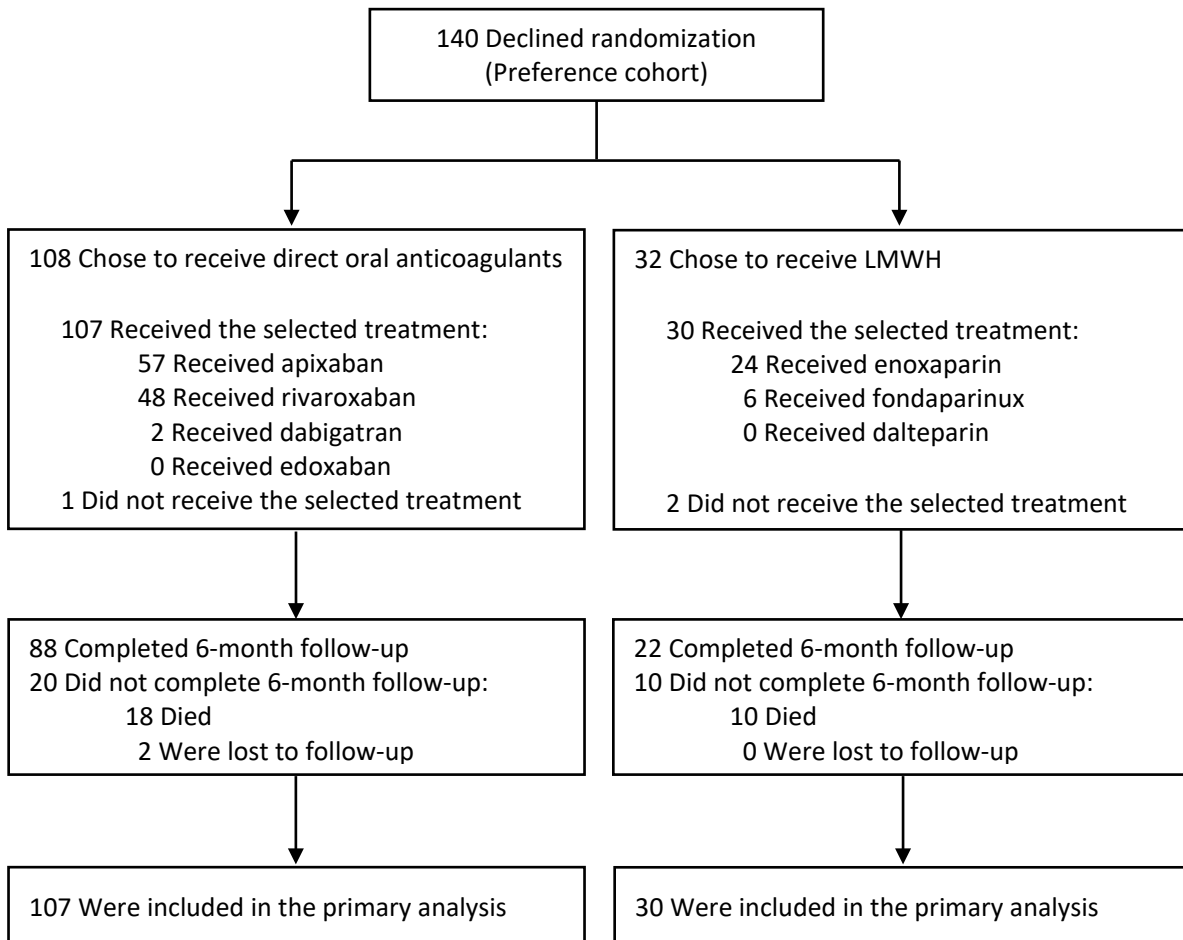

**eTable 2. Baseline Participant Characteristics in a Study of the Effect of Direct Oral Anticoagulants Versus Low Molecular Weight Heparins for Treatment of Venous Thromboembolic Events in Patients With Cancer (the Preference Cohort)**

| Characteristic                                          | Direct Oral Anticoagulant<br>(N = 107) | Low Molecular Weight Heparin<br>(N = 30) |
|---------------------------------------------------------|----------------------------------------|------------------------------------------|
| Age, median (q1, q3) , y                                | 66 (58, 72)                            | 67 (61, 72)                              |
| Age 65y or older (%)                                    | 62(58)                                 | 19(63)                                   |
| Gender (%)                                              |                                        |                                          |
| Female                                                  | 51(48)                                 | 18(60)                                   |
| Male                                                    | 56(52)                                 | 12(40)                                   |
| Ethnicity (%)                                           |                                        |                                          |
| Not Hispanic or Latino                                  | 101(97)                                | 28(100)                                  |
| Hispanic or Latino                                      | 3(3)                                   | 0                                        |
| Race (%) <sup>a</sup>                                   |                                        |                                          |
| White                                                   | 90(86)                                 | 23(77)                                   |
| Black or African American                               | 12(11)                                 | 3(10)                                    |
| Asian                                                   | 2(2)                                   | 2(7)                                     |
| American Indian or Alaskan Native                       | 1(1)                                   | 1(3)                                     |
| Native Hawaiian or Other Pacific Islander               | 0                                      | 1(3)                                     |
| Education Level (%)                                     |                                        |                                          |
| Grade school or less                                    | 2(2)                                   | 2(7)                                     |
| High school graduate or GED                             | 18(17)                                 | 2(7)                                     |
| Some vocational, business or trade school               | 7(7)                                   | 3(10)                                    |
| Some college                                            | 27(26)                                 | 9(31)                                    |
| College graduate and some graduate school but no degree | 25(24)                                 | 8(28)                                    |
| Graduate or professional degree                         | 26(25)                                 | 5(17)                                    |
| Body Mass Index, median (q1, q3)                        | 27.4 (23.6, 30.9)                      | 27.6 (24.7, 30.7)                        |
| Body Mass Index (%)                                     |                                        |                                          |
| Less than 18.5                                          | 3(3)                                   | 1(3)                                     |
| 18.5 to 24.9                                            | 33(31)                                 | 8(27)                                    |
| 25 to 29.9                                              | 38(36)                                 | 11(37)                                   |
| 30 or more                                              | 33(31)                                 | 10(33)                                   |
| Smoking Status (%)                                      |                                        |                                          |
| Never Smoker                                            | 54(52)                                 | 13(46)                                   |
| Former Smoker                                           | 43(41)                                 | 13(46)                                   |
| Current Smoker                                          | 7(7)                                   | 2(7)                                     |

|                                                                                   |        |        |
|-----------------------------------------------------------------------------------|--------|--------|
| Participant reported functional status [ECOG Performance Status] (%) <sup>b</sup> |        |        |
| 0                                                                                 | 53(50) | 14(50) |
| 1                                                                                 | 39(36) | 10(36) |
| >=2                                                                               | 15(14) | 4(14)  |
| Presence of Highly thrombogenic tumor (%) <sup>c</sup>                            |        |        |
|                                                                                   | 35(33) | 11(37) |
| Presence of Indwelling central venous catheter (%)                                |        |        |
|                                                                                   | 64(60) | 15(50) |
| Platelet Count [mm <sup>3</sup> ] (%) <sup>d</sup>                                |        |        |
| Below 100,000                                                                     | 10(9)  | 4(13)  |
| 100,000-149,000                                                                   | 22(21) | 2(7)   |
| 150,000-249,000                                                                   | 41(38) | 13(43) |
| 250,000-449,000                                                                   | 23(21) | 7(23)  |
| 450,000 and above                                                                 | 11(10) | 4(13)  |
| Serum albumin [g/dL] (%) <sup>e</sup>                                             |        |        |
| Below 3.5                                                                         | 43(40) | 12(40) |
| 3.5 or above                                                                      | 64(60) | 18(60) |
| Type of Cancer (%)                                                                |        |        |
| Gastrointestinal                                                                  | 45(42) | 11(37) |
| Breast                                                                            | 14(13) | 4(13)  |
| Lung                                                                              | 14(13) | 2(7)   |
| Lymphoma/Multiple Myeloma/CLL                                                     | 14(13) | 2(7)   |
| Gynecologic                                                                       | 6(6)   | 9(30)  |
| Genitourinary                                                                     | 6(6)   | 1(3)   |
| Sarcoma                                                                           | 4(4)   | 0      |
| Head and Neck                                                                     | 1(1)   | 0      |
| Brain                                                                             | 1(1)   | 0      |
| Skin/Melanoma                                                                     | 1(1)   | 0      |
| Other cancer type <sup>f</sup>                                                    | 1(1)   | 1(3)   |
| Evidence of any metastatic/disseminated disease (%) <sup>g</sup>                  |        |        |
| Liver metastases                                                                  | 27     | 7      |
| Lung metastases                                                                   | 23     | 5      |
| Bone metastases                                                                   | 11     | 3      |
| Brain metastases                                                                  | 2      | 2      |
| Other metastases                                                                  | 27     | 14     |
| Treatment with bevacizumab (%)                                                    |        |        |
|                                                                                   | 9(8)   | 6(20)  |
| Type of index VTE (%)                                                             |        |        |
| PE with or without DVT                                                            | 57(53) | 14(47) |

|                                                 |        |        |
|-------------------------------------------------|--------|--------|
| DVT alone                                       | 49(46) | 15(50) |
| Other type                                      | 1(1)   | 1(3)   |
| <hr/>                                           |        |        |
| Mode of presentation of index VTE (%)           |        |        |
| Presentation with symptoms or physical findings | 69(64) | 18(60) |
| Presentation detected on imaging                | 37(35) | 12(40) |
| Uncertain                                       | 1(1)   | 0      |
| <hr/>                                           |        |        |

Abbreviations: GED, general education development test; CLL, chronic lymphocytic leukemia; VTE, venous thromboembolism; PE, Pulmonary embolism; DVT, deep vein thrombosis.

Notes:

- a. Race is based on patient's self-report recorded in the EHR.
- b. ECOG performance status is a scale to assess the functional status of a patient. It was developed by the Eastern Cooperative Oncology Group and published in 1982. The score ranges from 0 to 5. The score 0 indicate the fully active and 5 indicates death.
- c. Highly thrombogenic tumor: pancreas, lung, esophagus, and ovarian
- d. Normal range of platelet count: 150,000-450,000 per mcL
- e. Normal range of serum albumin: 3.5-5.4 gm/dL
- f. Other cancer type: Chordoma (Direct Oral Anticoagulant group), Peritoneal cancer (Low Molecular Weight Heparin group)
- g. Evidence of any metastatic disease: the metastatic locations are not mutually exclusive.

**eTable 3. Clinical Outcomes at 6 Months in the Preference Cohort**

| Cohort                         | Endpoint                                                | Direct oral anticoagulant | Low molecular weight heparin | Difference |                 |                |
|--------------------------------|---------------------------------------------------------|---------------------------|------------------------------|------------|-----------------|----------------|
|                                |                                                         |                           |                              | Estimate   | 1-sided 0.95 CI | 2-sided 0.95CI |
| Preference Cohort <sup>a</sup> | N                                                       | 107                       | 30                           |            |                 |                |
|                                | Non-fatal VTE <sup>b</sup>                              |                           |                              |            |                 |                |
|                                | Recurrent VTE [%]                                       | 7.5                       | 4.1                          | 3.3        | (-100, 9.7)     | (-4.3, 10.9)   |
|                                | Mortality                                               |                           |                              |            |                 |                |
|                                | Death [%]                                               | 16.3                      | 23.8                         | -7.5       | NA              | (-20.9, 5.9)   |
|                                | Restricted mean survival time <sup>c</sup> [day]        | 166                       | 160                          | 6          | NA              | (-11, 24)      |
|                                | Bleeding                                                |                           |                              |            |                 |                |
|                                | Major bleeding <sup>d</sup> [%]                         | 11.5                      | 7.6                          | 3.9        | (-100, 13.7)    | (-7.8, 15.6)   |
|                                | Clinically relevant non-major bleeding <sup>e</sup> [%] | 5.0                       | 1.1                          | 3.9        | NA              | (-0.8, 8.6)    |
|                                | Nuisance bleeding <sup>f</sup> [%]                      | 14.0                      | 11.5                         | 2.5        | NA              | (-14.2, 19.2)  |
|                                | Adverse events safety endpoint                          |                           |                              |            |                 |                |
|                                | Any serious adverse events <sup>g</sup> [%]             | 50.5                      | 45.2                         | 5.2        | NA              | (-6.9, 17.3)   |
|                                | Severe serious adverse events <sup>h</sup> [%]          | 48.7                      | 42.5                         | 6.2        | NA              | (-6.4, 18.8)   |

Abbreviations: CI, confidence interval; VTE, venous thromboembolism.

- a. Adjusted by propensity score weighting
- b. Only VTEs that were non-fatal were considered because of the challenges of attributing cause of death in cancer patients to tumor progression versus VTE. Deaths irrespective of cause were considered as a secondary endpoint
- c. The truncation time 180 days was used for calculation of the restricted mean survival time, which is interpreted as 180-day lifetime expectancy
- d. Major bleeding was defined as Grade  $\geq 3$  on the Common Terminology Criteria for Adverse Events from the National Cancer Institute (NCI CTCAE) criteria version 5.0 (i.e., severe or medically significant but not immediately life-threatening; hospitalization or prolongation of hospitalization indicated; disabling; limiting self care activities of daily living).
- e. Clinically significant non-major bleeding was defined as Grade 2 on the NCI CTCAE criteria version 5.0
- f. Nuisance bleeding was defined as Grade 1 on the NCI CTCAE criteria version 5.0
- g. Any serious adverse events include VTE events and bleeding events of any grade
- h. Severe serious adverse events are defined as Grade 3 or higher on the NCI CTCAE criteria version 5.0



**eTable 4. Patient-Reported Outcomes in the Preference Cohort: Health-Related Quality of Life, Treatment Burden and Persistence With Anticoagulant Therapy**

| Endpoint                                                  |                                                    | Direct oral anticoagulant | Low molecular weight heparin | Difference (0.95 CI) |
|-----------------------------------------------------------|----------------------------------------------------|---------------------------|------------------------------|----------------------|
| Preference Cohort <sup>a</sup>                            | N                                                  | 107                       | 30                           |                      |
|                                                           | N surveyed at 3 months <sup>b</sup>                | 77/99 (78%)               | 16/26 (62%)                  |                      |
|                                                           | N surveyed at 6 months <sup>b</sup>                | 75/89 (84%)               | 12/21 (57%)                  |                      |
| <b>Health-related QOL<sup>c</sup></b>                     |                                                    |                           |                              |                      |
|                                                           | Change in physical health at 3 months <sup>d</sup> | 3.4                       | 1.8                          | 1.6 (-7.5, 10.7)     |
|                                                           | Change in physical health at 6 months <sup>d</sup> | 2.7                       | -1.0                         | 3.7 (-4.5, 11.8)     |
|                                                           | Change in mental health at 3 months <sup>d</sup>   | 0.3                       | 1.0                          | -0.7 (-6.1, 4.8)     |
|                                                           | Change in mental health at 6 months <sup>d</sup>   | 0.6                       | 0.4                          | 0.2 (-5.9, 6.3)      |
| <b>Anti-Clot Treatment Scale</b>                          |                                                    |                           |                              |                      |
|                                                           | Benefit <sup>e</sup> at 3 months                   | 10.3                      | 10.5                         | -0.3 (-1.8, 1.3)     |
|                                                           | Benefit <sup>e</sup> at 6 months                   | 11.3                      | 10.3                         | 1.0 (-0.5, 2.6)      |
|                                                           | Burden <sup>f</sup> at 3 months                    | 55.4                      | 55.3                         | 0.1 (-2.3, 2.4)      |
|                                                           | Burden <sup>f</sup> at 6 months                    | 54.2                      | 52.5                         | 1.8 (-1.7, 5.2)      |
| <b>Persistence with anticoagulant therapy<sup>g</sup></b> |                                                    |                           |                              |                      |
|                                                           | Assigned anticoagulant at 3 months [%]             | 86.7                      | 79.5                         | 7.2 (-8.6, 23.0)     |
|                                                           | Assigned anticoagulant at 6 months [%]             | 74.3                      | 60.2                         | 14.1 (-5.3, 33.5)    |
|                                                           | On any anticoagulant therapy at 3 months [%]       | 89.5                      | 90.6                         | -1.1 (-13.0, 10.9)   |
|                                                           | On any anticoagulant therapy at 6 months [%]       | 76.9                      | 73.9                         | 3.0 (-14.6, 20.6)    |

Abbreviations: CI, confidence interval; QOL, quality of life.

a. Adjusted by propensity score weighting

b. Respondents among non-deceased participants

c. Health-related quality of life was measured using the 12-Item Short Form Health Survey (SF-12) sub-scales for physical and mental health. Survey content included minor verbiage changes for clarity.

d. Change in score from baseline

e. The benefit scale has 3 items with scores from 3 to 15

f. The burden scale has 12 items with scores from 12 to 60. Higher scores signify greater satisfaction (lower burden)

g. Participants who died prior to month 3 or 6 were considered persistent users if they were not known to have stopped treatment prior to death. Persistent use of anticoagulant therapy was ascertained based on both participant surveys and the electronic health record. "Assigned anticoagulant" is defined as any of apixaban, dabigatran, edoxaban and rivaroxaban for the direct oral anticoagulant (DOAC) group and any of enoxaparin, dalteparin and fondaparinux for the low molecular weight heparin (LMWH) group. "Any anticoagulant therapy" is defined as any of those medication listed for DOAC and LMWH plus Warfarin. Patients who died or lost-to-follow-up at 3 (or 6) months were included in the denominator in calculating these proportions.

**eTable 5. Propensity Score Model Used for Adjustment of Potential Confounding Factors in the Preference Cohort**

|                                       | Odds Ratio | 0.95CI        | p-value |
|---------------------------------------|------------|---------------|---------|
| Intercept                             | 5.96       | (0.91, 38.99) | 0.062   |
| Age 65 or older vs. others            | 0.89       | (0.33, 2.38)  | 0.820   |
| Female vs. Male                       | 0.45       | (0.17, 1.16)  | 0.097   |
| White vs. Non-White                   | 2.03       | (0.59, 6.94)  | 0.258   |
| Collage grad or higher vs. others     | 1.27       | (0.50, 3.22)  | 0.613   |
| BMI $\geq$ 25 vs. BMI<25              | 0.52       | (0.18, 1.51)  | 0.229   |
| Never Smoker vs. others               | 0.97       | (0.38, 2.47)  | 0.948   |
| ECOG PS=0 vs. 1/2/3/4                 | 1.03       | (0.37, 2.83)  | 0.962   |
| High Throbogenic Tumor yes vs. no     | 0.60       | (0.22, 1.59)  | 0.300   |
| Indwelling central venous yes vs. no  | 3.11       | (1.10, 8.82)  | 0.033   |
| Platelet < 150K vs. $\geq$ 150K       | 1.86       | (0.62, 5.55)  | 0.265   |
| Alubmin $\geq$ 3.5mg/dL vs. <3.5mg/dL | 0.72       | (0.24, 2.12)  | 0.545   |
| Metastasis yes vs. no                 | 0.39       | (0.13, 1.19)  | 0.098   |
| Bevacizmab use yes vs. no             | 0.20       | (0.05, 0.79)  | 0.022   |
| Index VTE was PE vs non PE            | 1.56       | (0.61, 3.97)  | 0.349   |

**eTable 6. Association Between the Treatment Selection and the Baseline Characteristics With and Without Adjustment by the Inverse Probability Weighting by the Propensity Scores in the Preference Cohort**

| Baseline characteristics                                          | Unadjusted difference |         | Adjusted difference |         |
|-------------------------------------------------------------------|-----------------------|---------|---------------------|---------|
|                                                                   | Odds Ratio            | P-value | Odds Ratio          | P-value |
| Age 65 or older vs. others                                        | 0.80                  | 0.596   | 0.92                | 0.742   |
| Female vs. Male                                                   | 0.61                  | 0.235   | 0.99                | 0.967   |
| White vs. Non-White                                               | 1.61                  | 0.346   | 1.14                | 0.665   |
| Collage grad or higher vs. others                                 | 1.19                  | 0.675   | 1.17                | 0.534   |
| BMI >=25 vs. BMI<25                                               | 0.85                  | 0.707   | 0.76                | 0.316   |
| Never Smoker vs. others                                           | 1.33                  | 0.490   | 0.81                | 0.402   |
| ECOG PS=0 vs. 1/2/3/4                                             | 1.12                  | 0.781   | 0.96                | 0.875   |
| High Throbogenic Tumor yes vs. no                                 | 0.84                  | 0.685   | 1.26                | 0.391   |
| Indwelling central venous yes vs. no                              | 1.49                  | 0.338   | 1.35                | 0.219   |
| Platelet < 150K vs. >=150K                                        | 1.71                  | 0.288   | 1.01                | 0.960   |
| Alubmin >=3.5mg/dL vs. <3.5mg/dL                                  | 0.99                  | 0.985   | 0.88                | 0.619   |
| Metastasis yes vs. no                                             | 0.45                  | 0.095   | 1.05                | 0.856   |
| Bevacizmab use yes vs. no                                         | 0.37                  | 0.081   | 0.94                | 0.870   |
| Index VTE was PE vs non PE                                        | 1.30                  | 0.523   | 0.96                | 0.873   |
| Index VTE was detected by symptom or physical findings vs. others | 1.21                  | 0.652   | 1.49                | 0.116   |
