# Supplementary material
Source: PubMed Central journal article supplement (PMC10265290)
Supplement: jama-e237843-s003.pdf [file jama-e237843-s003.pdf]

## Supplemental Online Content: Nonauthor Collaborators

\*First name, last name, and suffix (if applicable) are required and will appear in PubMed.

| <b>*Group Name(s): CANVAS Investigators</b> |                   |                              |                         |                                                                  |                        |                             |
|---------------------------------------------|-------------------|------------------------------|-------------------------|------------------------------------------------------------------|------------------------|-----------------------------|
| <b>*First Name and Middle Initial(s)</b>    | <b>*Last Name</b> | <b>*Suffix (eg, Jr, III)</b> | <b>Academic Degrees</b> | <b>Institution</b>                                               | <b>Location</b>        | <b>Role or Contribution</b> |
| Kenneth N. M.                               | Sumida            |                              | MD                      | University of Hawaii Cancer Center                               | Honolulu, HI, US       | Site Principal Investigator |
| Robert C.                                   | Martin            |                              | MD, PhD                 | The James Graham Brown Cancer Center at University of Louisville | Louisville, KY, US     | Site Principal Investigator |
| Maria T.                                    | Grosse Perdekamp  |                              | MD                      | The Carle Foundation Hospital                                    | Urbana, IL, US         | Site Principal Investigator |
| Ben                                         | Yan               |                              | MD                      | Baycare Health System - Morton Plant Mease                       | Clearwater, FL, US     | Site Principal Investigator |
| Donald                                      | Doll              |                              | MD                      | Ellis Fischel Cancer Center University of Missouri Healthcare    | Columbia, MI, US       | Site Principal Investigator |
| Anna Ninny J.                               | Abraham           |                              | MD                      | Memorial Regional Hospital                                       | Pembroke Pines, FL, US | Site Principal Investigator |
| Tzu-Fei                                     | Wang              |                              | MD                      | The James Cancer Hospital and Solove Research Institute          | Columbus, OH, US       | Site Principal Investigator |
| Ryan M.                                     | Jones             |                              | MD                      | Walter Reed National Military Medical Center                     | Bethesda, MD, US       | Site Principal Investigator |
| Abirami                                     | Sivapiragasm      |                              | MD                      | SUNY Upstate Medical University                                  | Syracuse, NY, US       | Site Principal Investigator |
| Ellis G.                                    | Levine            |                              | MD                      | Roswell Park Cancer Institute                                    | Buffalo, NY, US        | Site Principal Investigator |
| Kamal                                       | Haider            |                              | MD                      | Lakeland Regional Health Hollis Cancer Center                    | Lakeland, FL, US       | Site Principal Investigator |
| Paula M.                                    | Rosenblatt        |                              | MD                      | University of Maryland Medical Center                            | Baltimore, MD, US      | Site Principal Investigator |
| James W.                                    | Fleshman          |                              | MD                      | Baylor University Medical Center                                 | Dallas, TX, US         | Site Principal Investigator |
| William J.                                  | Irvin             | Jr                           | MD                      | Bon Secours St. Francis Medical Center                           | Dallas, TX, US         | Site Principal Investigator |
| Meghana                                     | Raghavendra       |                              | MD                      | Franciscan St. Francis Health-Indianapolis                       | Indianapolis, IN, US   | Site Principal Investigator |
| Andrea R.                                   | Dean              |                              | MD                      | Loyola University                                                | Maywood, IL, US        | Site Principal Investigator |
| Michael M.                                  | Goodman           |                              | MD                      | Wake Forest Baptist Health                                       | Winston Salem, NC, US  | Site Principal Investigator |
| Susanna                                     | Hong              |                              | MD                      | Middlesex Hospital                                               | Middletown, CT, US     | Site Principal Investigator |
| Lisa M.                                     | Baumann Kreuziger |                              | MD, MS                  | Froedtert and the Medical College of Wisconsin                   | Milwaukee, WI, US      | Site Principal Investigator |
| Isaac A.                                    | Bowman            |                              | MD                      | University of Texas Southwestern Medical Center                  | Dallas, TX, US         | Site Principal Investigator |

## Supplemental Online Content: Nonauthor Collaborators

\*First name, last name, and suffix (if applicable) are required and will appear in PubMed.

| *First Name and Middle Initial(s) | *Last Name  | *Suffix (eg, Jr, III) | Academic Degrees | Institution                                                                      | Location              | Role or Contribution        |
|-----------------------------------|-------------|-----------------------|------------------|----------------------------------------------------------------------------------|-----------------------|-----------------------------|
| Steve K. M. S.                    | Lo          |                       | MD               | The Stamford Hospital                                                            | Stamford, CT, US      | Site Principal Investigator |
| Alfonso J.                        | Tafur       |                       | MD, MSc          | NorthShore University HealthSystem                                               | Skokie, IL, US        | Site Principal Investigator |
| Anthony J.                        | Jaslawski   |                       | MD               | Green Bay Oncology, Ltd./HSBS St. Vincent Hospital                               | Green Bay, WI, US     | Site Principal Investigator |
| Misbah U.                         | Qadir       |                       | MD               | Kinston Medical Specialists, PA                                                  | Kinston, NC, US       | Site Principal Investigator |
| Anasuya                           | Gunturi     |                       | MD, PhD          | Lowell General Hospital Cancer Center                                            | Lowell, MA, US        | Site Principal Investigator |
| Moniba                            | Nazeef      |                       | MD               | University of Wisconsin Hospital                                                 | Madison, WI, US       | Site Principal Investigator |
| Kelvin                            | Raybon      |                       | MD               | Augusta Health Cancer Center                                                     | Fishersville, VA, US  | Site Principal Investigator |
| Robert I.                         | Kaplan      |                       | MD               | Western Pennsylvania Hospital                                                    | Pittsburgh, PA, US    | Site Principal Investigator |
| Astrid C.                         | Andreescu   |                       | MD               | Eastern Maine Medical Center                                                     | Bangor, ME, US        | Site Principal Investigator |
| Dan                               | Sotirescu   |                       | MD               | WellSpan Health York Cancer Center                                               | York, PA, US          | Site Principal Investigator |
| John C.                           | Keech       |                       | DO               | MultiCare Tacoma General Hospital                                                | Tacoma, WA, US        | Site Principal Investigator |
| Albert S.                         | Malcolm     |                       | MD               | Veteran Affairs Medical Center - Dayton                                          | Dayton, OH, US        | Site Principal Investigator |
| Florin D.                         | Andreca     |                       | MD               | Wright Patterson Medical Center                                                  | Dayton, OH, US        | Site Principal Investigator |
| Vinay I.                          | Shah        |                       | MD               | Henry Ford Health System                                                         | Detroit, MI, US       | Site Principal Investigator |
| Andrew D.                         | Leavitt     |                       | MD               | University of California San Francisco Medical Center-Mission Bay                | San Francisco, CA, US | Site Principal Investigator |
| Benjamin T.                       | Marchello   |                       | MD               | Montana Cancer Consortium                                                        | Billings, MT, US      | Site Principal Investigator |
| Daniel                            | Flora       |                       | MD, PharmD       | Saint Elizabeth Healthcare - Edgewood                                            | Fort Thomas, KY, US   | Site Principal Investigator |
| Douglas                           | Weckstein   |                       | MD               | Solinsky Center for Cancer Care                                                  | Concord, NH, US       | Site Principal Investigator |
| Neelesh S.                        | Bangalore   |                       | MD, PhD          | Saint Joseph's Medical Center                                                    | Tracey, CA, US        | Site Principal Investigator |
| Jessica                           | Belmonte    |                       | MD               | University of New Mexico                                                         | Albuquerque, NM, US   | Site Principal Investigator |
| Aldemar                           | Montero     |                       | MD               | Gwinnett Health System                                                           | Lawrenceville, GA, US | Site Principal Investigator |
| Surbhi P.                         | Shah        |                       | MD               | University of Minnesota, Masonic Cancer Center                                   | Minneapolis, MN, US   | Site Principal Investigator |
| Michael                           | Constantine |                       | MD               | Dana-Farber/Brigham and Women's Cancer Center at Milford Regional Medical Center | Milford, MA, US       | Site Principal Investigator |

Supplemental Online Content: Nonauthor Collaborators

\*First name, last name, and suffix (if applicable) are required and will appear in PubMed.

| *First Name and Middle Initial(s) | *Last Name | *Suffix (eg, Jr, III) | Academic Degrees | Institution                                                           | Location            | Role or Contribution        |
|-----------------------------------|------------|-----------------------|------------------|-----------------------------------------------------------------------|---------------------|-----------------------------|
| Meredith                          | Faggen     |                       | MD               | Dana-Farber/Brigham and Women's Cancer Center at South Shore Hospital | Weymouth, MA, US    | Site Principal Investigator |
| Frederick                         | Briccetti  |                       | MD               | Dana-Farber/New Hampshire Oncology Hematology                         | Londonderry, NH, US | Site Principal Investigator |
| Christopher                       | Lathan     |                       | MD, MS, MPH      | Dana-Farber Cancer Institute at St. Elizabeth's Medical Center        | Brighton, MA, US    | Site Principal Investigator |
| Robert L.                         | D'Agostino |                       | MD               | Family Practice                                                       | Canton, MA, US      | Consultant                  |
| Randolph                          | Fenninger  |                       | JD               | National Blood Clot Alliance                                          | Philadelphia, PA    | Consultant                  |
| Thomas                            | Delate     |                       | PhD, MS          | Kaiser Permanente Colorado                                            | Aurora, CO          | Consultant                  |
