# Supplementary material
Source: PubMed Central journal article supplement (PMC10265290)
Supplement: jama-e237843-s004.pdf [file jama-e237843-s004.pdf]

## Data Sharing Statement

### Data

**Data available:** Yes

**Data types:** Deidentified participant data, Data dictionary

**How to access data:** [schragd@mskcc.org](mailto:schragd@mskcc.org)

**When available:** beginning date: 01-01-2023

### Supporting Documents

**Document types:** Statistical/analytic code, Informed consent form

**How to access documents:** [schragd@mskcc.org](mailto:schragd@mskcc.org)

**When available:** beginning date: 01-01-2023

### Additional Information

**Who can access the data:** Researchers whose proposals have been approved by the study investigators and the Alliance for Clinical Trials

**Types of analyses:** For all reasonable academic purposes eg metaanalyses.

**Mechanisms of data availability:** after approval of a proposal

**Any additional restrictions:** Requires alliance approval and review
